# Supplementary material for: Proteomics Computational Analyses Suggest that the Antennavirus Glycoprotein Complex Includes a Class I Viral Fusion Protein (α-Penetrene) with an Internal Zinc-Binding Domain and a Stable Signal Peptide
Source: PubMed Central journal article supplement (PMC6722660; doi:10.3390/v11080750), 2019-08-14
Supplement: viruses-11-00750-s001.pdf [file viruses-11-00750-s001.pdf]

Supplementary Files

# **Proteomics Computational Analyses Suggest that the Antennavirus Glycoprotein Complex Includes a Class I Viral Fusion Protein ( $\alpha$ -Penetrene) with an Internal Zinc-Binding Domain and a Stable Signal Peptide**

**Courtney E. Garry**<sup>1</sup> and **Robert F. Garry**<sup>2,3,\*</sup>

<sup>1</sup> School of Nursing, Johns Hopkins University, Baltimore, MD 21205, USA; courtneygarry@gmail.com

<sup>2</sup> Department of Microbiology and Immunology, Tulane University School of Medicine, New Orleans, LA 70112, USA

<sup>3</sup> Zalgen Labs, Germantown, MD 20876, USA

\* Correspondence: rfgarry@tulane.edu; Tel.: +1-504-988-2027

Table S1. Genbank accession numbers used for sequence and structural analyses.

| Genus                                | Virus                                     | Abbreviation | glycoprotein   | nucleoprotein  | RdRp           | Zinc-binding protein |
|--------------------------------------|-------------------------------------------|--------------|----------------|----------------|----------------|----------------------|
| <i>Antennavirus</i>                  | Wënling frogfish<br>arenavirus 1          | WIFAV-1      | YP_009551553.1 | AVM87642.1     | YP_009551555.1 | Not encoded          |
|                                      | Wënling frogfish<br>arenavirus 2          | WIFAV-2      | YP_009551607.1 | YP_009551604.1 | YP_009551605.1 | Not encoded          |
| <i>Hartmannivirus</i>                | Haartman<br>Institute snake<br>virus 1    | HISV-1       | AKN10683.2     | AKN10684.1     | AKN10711.2     | Not encoded          |
|                                      | Haartman<br>Institute snake<br>virus 2    | HISV-2       | AZI72593.1     | AZI72594.1     | AZI72627.1     | Not encoded          |
|                                      | Veterinary<br>Pathology Zurich<br>virus 2 | VPZV-2       | AZI72595.1     | AZI72596.1     | AZI72628.1     | Not encoded          |
|                                      | Old schoolhouse<br>virus 1                | OScV-1       | AZI72579.1     | AZI72580.1     | AZI72620.1     | Not encoded          |
| <i>Reptarenavirus</i>                | CAS virus                                 | CASV         | YP_006590086.1 | YP_006590087.1 | YP_006590093.1 | YP_006590092.1       |
|                                      | University of<br>Giessen virus            | UGV          | AZI72713.1     | AZI72714.1     | YP_009508466.1 | AZI72641.1           |
|                                      | Golden Gate virus                         | GGV          | YP_006590090.1 | YP_006590091.1 | YP_006590089.1 | YP_006590088.1       |
|                                      | Rotterdam virus                           | ROUTV        | YP_009019194.1 | YP_009019195.1 | YP_009019197.1 | YP_009019196.1       |
| <i>Mammarenavirus</i><br>(Old World) | Lassa virus                               | LASV         | NP_694870.1    | NP_694869.1    | AEY85215.1     | AEY85214.1           |
|                                      | Lujo virus                                | LUJV         | YP_002929490.1 | YP_002929491.1 | AFP21519.1     | AFP21518.1           |
|                                      | Ippy virus                                | IPPYV        | YP_516230.1    | YP_516231.1    | YP_516233.1    | NC_007906.1          |
|                                      | Wenzhou virus                             | WENV         | YP_009113206.1 | YP_009113207.1 | YP_009113209.1 | AUF72662.1           |
| <i>Mammarenavirus</i><br>(New World) | Junin Virus                               | JUNV         | ACS12870.1     | ACS12871.1     | AEB32439.1     | AEB32438.1           |
|                                      | Machupo virus                             | MACV         | YP_089665.1    | YP_089666.1    | YP_089660.1    | AIG51561.1           |
|                                      | Guanarito virus                           | GOTV         | ALE15097.1     | AAT88083.1     | ALE15099.1     | NP_899220.1          |
|                                      | Oliveros virus                            | OLVV         | YP_001649210.1 | YP_001649211.1 | YP_001649214.1 | YP_001649215.1       |

|                      |                                |      |                |                |                |                |
|----------------------|--------------------------------|------|----------------|----------------|----------------|----------------|
|                      | California<br>(Pichinde) virus | CALV | AAB58485.2     | AAD31540.2     | AER45496.1     | AER45495.1     |
|                      | Flexal virus                   | FLEV | YP_001936019.1 | YP_001936020.1 | YP_001936024.1 | YP_001936023.1 |
|                      | Whitewater<br>Arroyo virus     | WWAV | YP_001911113.1 | YP_001911114.1 | YP_001911120.1 | YP_001911119.1 |
|                      | Ebola virus                    | EBOV | AAD14585.1     | ALT19749.1     | AAD14589.1     | Not encoded    |
|                      | Sudan virus                    | SUDV | ACR33190.1     | AWK96640.1     | ALT19784.1     | Not encoded    |
| <i>Ebolavirus</i>    | Bundibugyo virus               | BDBV | AKB09565.1     | AKB09560.1     | ACI28627.1     | Not encoded    |
|                      | Bombali virus                  | BOMV | ASJ82208.1     | QAT98503.1     | QAT98511.1     | Not encoded    |
|                      | Marburg virus                  | MARV | CAA78117.1     | CAA78114.1     | ABA87130.1     | Not encoded    |
| <i>Marburgovirus</i> | Ravn virus                     | RAVV | ABS17551.1     | ACD13016.1     | ACD13022.1     | Not encoded    |

---

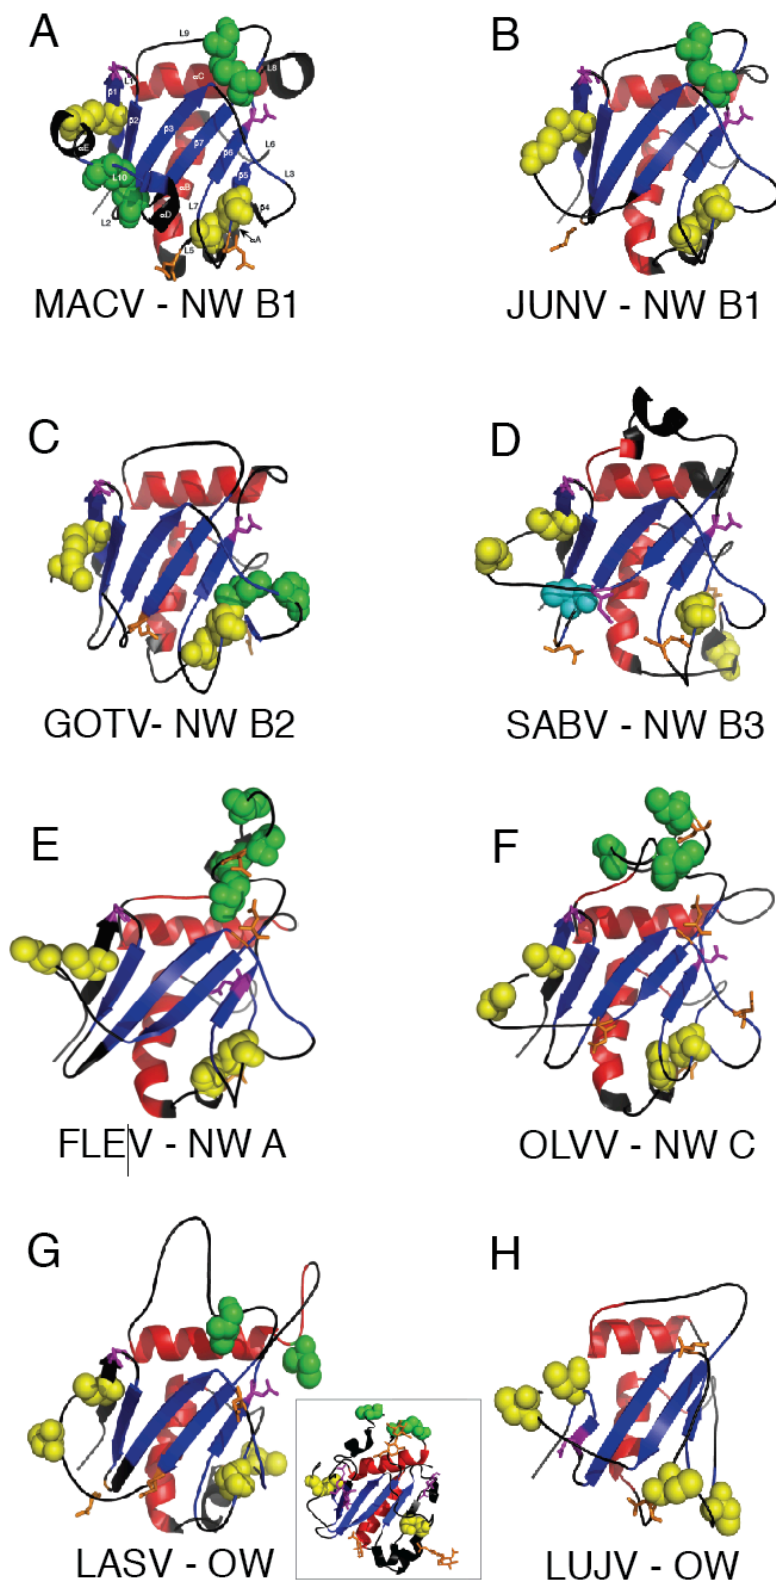

Figure S1. Conserved structure of mammarenaviruses glycoprotein 1. Shown are commonly placed  $\alpha$ -helices (red) and a  $\beta$ -sandwich (blue arrows) that comprises the receptor-binding domain. There are two conserved cysteine linkages (yellow) and two conserved N-linked glycans (purple). Virus abbreviations: Machupo MACV, Junin JUNV, Guanarito GOTV, Sabia SABV, Flexal FLEV, Olivaros OLLV, Lassa LASV, Lujo LUJV. Inset: crystal structure of LASV GP1 in the prefusion trimer (PDB 5VK2). Old World OW, New World NW. A, B, C designate sublineages.

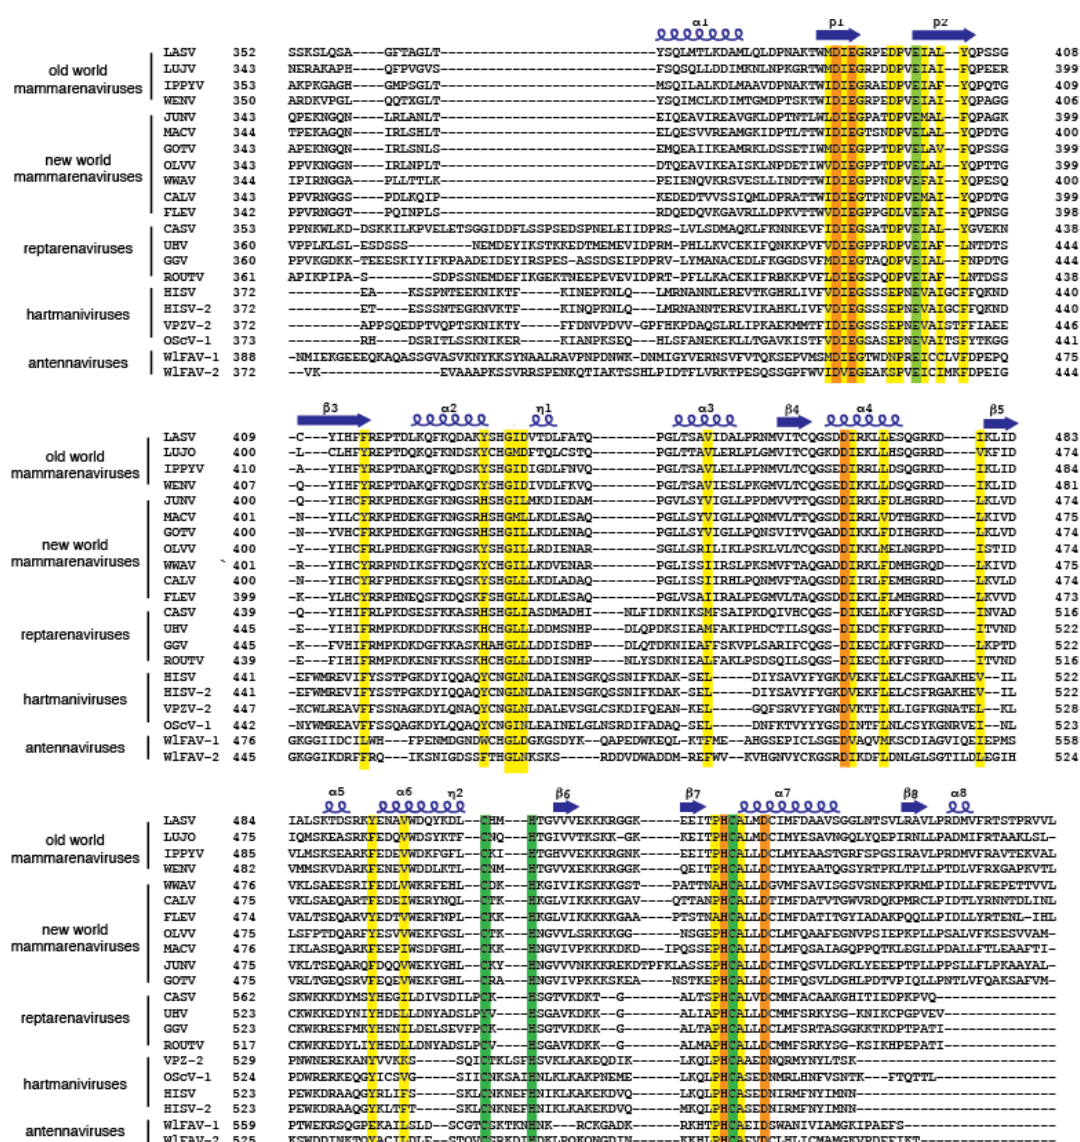

Figure S2. Amino acid sequence alignments of the C-termini of nucleoproteins from representative members of the four arenavirus genera. Residues that are conserved (identical or chemically similar) are highlighted in yellow. Virus abbreviations as in Figure 5. Blue springs represent helical structures and blue arrows are beta sheets. Conserved residues in the active site of the endonuclease (DEDDh box) are highlighted in orange and residues that comprise a conserved metal binding domain are highlighted in green.

|                               |         |      |                                                                                                                 |      |
|-------------------------------|---------|------|-----------------------------------------------------------------------------------------------------------------|------|
| old world<br>mammarenaviruses | LASV    | 1024 | ETQF---CFKLLMANTMGRYTHYSKRLNFKDFMGKLDVVRLICEENSEALSKALSLNCTTAMLNKLFCYQSQSPQYDVGDPDRGLFQLSVYSVGQGNRLVIGDRLR      | 1139 |
|                               | LUJV    | 1049 | DWFK---CFKTLIASDVRNRVYDRKSRRLGTFDAALGKSTRSISEENSEALSKALSLNCTTAMLNKLFCYQSQSPQYDVGDPDRGLFQLSVYSVGQGNRLVIGDRLR     | 1164 |
|                               | IPFV    | 1010 | EYFH---CFKSLQKQDANKLGGKSHYSQNLFNFDFGMDGDDGIKSEENSEALSKALSLNCTTAMLNKLFCYQSQSPQYDVGDPDRGLFQLSVYSVGQGNRLVIGDRLR    | 1125 |
|                               | WNV     | 1027 | EYFH---CFKSLQKQDANKLGGKSHYSQNLFNFDFGMDGDDGIKSEENSEALSKALSLNCTTAMLNKLFCYQSQSPQYDVGDPDRGLFQLSVYSVGQGNRLVIGDRLR    | 1142 |
|                               | JUV     | 1021 | EYFH---CFKTLIQDGDQLQGYEHRKSRRLGTFDAALGKSTRSISEENSEALSKALSLNCTTAMLNKLFCYQSQSPQYDVGDPDRGLFQLSVYSVGQGNRLVIGDRLR    | 1116 |
|                               | MACV    | 1025 | EYFH---CFKTLIQDGDQLQGYEHRKSRRLGTFDAALGKSTRSISEENSEALSKALSLNCTTAMLNKLFCYQSQSPQYDVGDPDRGLFQLSVYSVGQGNRLVIGDRLR    | 1140 |
| new world<br>mammarenaviruses | GOTV    | 1011 | EFFF---CFVTLIQAGFDQRLQGYEHRKSRRLGTFDAALGKSTRSISEENSEALSKALSLNCTTAMLNKLFCYQSQSPQYDVGDPDRGLFQLSVYSVGQGNRLVIGDRLR  | 1126 |
|                               | OLVU    | 1034 | DLFE---CFVTLIASGFDQRLQGYEHRKSRRLGTFDAALGKSTRSISEENSEALSKALSLNCTTAMLNKLFCYQSQSPQYDVGDPDRGLFQLSVYSVGQGNRLVIGDRLR  | 1149 |
|                               | WRV     | 1020 | DYFE---CFVTLIASGFDQRLQGYEHRKSRRLGTFDAALGKSTRSISEENSEALSKALSLNCTTAMLNKLFCYQSQSPQYDVGDPDRGLFQLSVYSVGQGNRLVIGDRLR  | 1135 |
|                               | CALV    | 998  | DYFE---CFVTLIASGFDQRLQGYEHRKSRRLGTFDAALGKSTRSISEENSEALSKALSLNCTTAMLNKLFCYQSQSPQYDVGDPDRGLFQLSVYSVGQGNRLVIGDRLR  | 1113 |
| reptarenaviruses              | FLEW    | 1013 | DFFE---CFVTLIVSDFDQRLQGYEHRKSRRLGTFDAALGKSTRSISEENSEALSKALSLNCTTAMLNKLFCYQSQSPQYDVGDPDRGLFQLSVYSVGQGNRLVIGDRLR  | 1128 |
|                               | CASV    | 957  | DIFS---SFRLLNAGFNQFQTYTHRSQGSQSLILKLDYRKKMMISKRINSEALSKALSLNCTTAMLNKLFCYQSQSPQYDVGDPDRGLFQLSVYSVGQGNRLVIGDRLR   | 1072 |
|                               | URV     | 952  | EFFS---SFRLLNAGFNQFQTYTHRSQGSQSLILKLDYRKKMMISKRINSEALSKALSLNCTTAMLNKLFCYQSQSPQYDVGDPDRGLFQLSVYSVGQGNRLVIGDRLR   | 1067 |
|                               | GGV     | 983  | EFFS---SFRLLNAGFNQFQTYTHRSQGSQSLILKLDYRKKMMISKRINSEALSKALSLNCTTAMLNKLFCYQSQSPQYDVGDPDRGLFQLSVYSVGQGNRLVIGDRLR   | 1098 |
| hantmaniruses                 | ROUTV   | 842  | EYFS---SFRLLNAGFNQFQTYTHRSQGSQSLILKLDYRKKMMISKRINSEALSKALSLNCTTAMLNKLFCYQSQSPQYDVGDPDRGLFQLSVYSVGQGNRLVIGDRLR   | 1097 |
|                               | HISV-1  | 846  | FDLSEHC---TLKIKINIDRLII---LQAGLKQTKQMLSRNTAIELLNLIRKAKIKNEII---SELFCIDLLEIPNMLALYDVGDPDRGLFQLSVYSVGQGNRLVIGDRLR | 946  |
|                               | HISV-2  | 822  | FDLSEHC---TLKIKINIDRLII---LQAGLKQTKQMLSRNTAIELLNLIRKAKIKNEII---SELFCIDLLEIPNMLALYDVGDPDRGLFQLSVYSVGQGNRLVIGDRLR | 946  |
|                               | VP2V-1  | 852  | FDLSEHC---TLKIKINIDRLII---LQAGLKQTKQMLSRNTAIELLNLIRKAKIKNEII---SELFCIDLLEIPNMLALYDVGDPDRGLFQLSVYSVGQGNRLVIGDRLR | 952  |
| antennaviruses                | Oscv-1  | 850  | FDLSEHC---TLKIKINIDRLII---LQAGLKQTKQMLSRNTAIELLNLIRKAKIKNEII---SELFCIDLLEIPNMLALYDVGDPDRGLFQLSVYSVGQGNRLVIGDRLR | 950  |
|                               | W1FAV-1 | 947  | DFTFAELLRCLLRKRRDFNKGANLIL---TKRKEELVRRKSRVSKRTTSTIALMDLRLQ---GEQT---TLESKR---GATPLPTGQANVIGDGPTELIQGLE         | 1046 |
|                               | W1FAV-2 | 940  | DHLTATAGLLLLRKRDFPKGRKRAI---QRVDELRIRGRTRYSKRTTSTAALMDLRLQ---GEQT---TLESKR---GATPLPTGQANVIGDGPTELIQGLE          | 1041 |
|                               | LASV    | 1139 | TNMFRLIIEYFAELGLQGGCCILNKEEFNALILGM---KLVNSLAHSGYQMSKRWPMKPFLLVTLVQL---LIFLKLQDQDKRDIYDGL                       | 1230 |
| old world<br>mammarenaviruses | LUJV    | 1165 | TNMFRLIIEYFESLQGLGQCCILNKEEFNALILGM---KQCIREGNLGYNRDKWPMKPFLLVTLVQL---LKYTKD---PDKPIEHLSTL                      | 1261 |
|                               | IPFV    | 1126 | TNMFRLIIEYFESLQGLGQCCILNKEEFNALILGM---KLVNSLAHSGYQMSKRWPMKPFLLVTLVQL---LIFLKLQDQDKRDIYDGL                       | 1216 |
|                               | WNV     | 1143 | TNMFRLIIEYFAELQGLGQCCILNKEEFNALILGM---RIVSLSAQSTLSENRDQWPMKPFLLVTLVQL---DLKSFQKTEVLDGKNIDSTL                    | 1233 |
|                               | JUV     | 1127 | TNMFRLIIEYFESLQGLGQCCILNKEEFNALILGM---KLVNSLAHSGYQMSKRWPMKPFLLVTLVQL---LIFLKLQDQDKRDIYDGL                       | 1216 |
|                               | MACV    | 1137 | TNMFRLIIEYFESLQGLGQCCILNKEEFNALILGM---KLVNSLAHSGYQMSKRWPMKPFLLVTLVQL---LIFLKLQDQDKRDIYDGL                       | 1230 |
|                               | GOTV    | 1150 | TNMFRLIIEYFESLQGLGQCCILNKEEFNALILGM---KLVNSLAHSGYQMSKRWPMKPFLLVTLVQL---LIFLKLQDQDKRDIYDGL                       | 1216 |
| new world<br>mammarenaviruses | OLVU    | 1127 | TNMFRLIIEYFESLQGLGQCCILNKEEFNALILGM---KLVNSLAHSGYQMSKRWPMKPFLLVTLVQL---LIFLKLQDQDKRDIYDGL                       | 1216 |
|                               | WRV     | 1136 | TNMFRLIIEYFESLQGLGQCCILNKEEFNALILGM---KLVNSLAHSGYQMSKRWPMKPFLLVTLVQL---LIFLKLQDQDKRDIYDGL                       | 1216 |
|                               | CALV    | 1129 | TNMFRLIIEYFESLQGLGQCCILNKEEFNALILGM---KLVNSLAHSGYQMSKRWPMKPFLLVTLVQL---LIFLKLQDQDKRDIYDGL                       | 1216 |
|                               | FLEW    | 1150 | TNMFRLIIEYFESLQGLGQCCILNKEEFNALILGM---KLVNSLAHSGYQMSKRWPMKPFLLVTLVQL---LIFLKLQDQDKRDIYDGL                       | 1216 |
| reptarenaviruses              | CASV    | 1073 | TNMFRLIIEYFESLQGLGQCCILNKEEFNALILGM---KLVNSLAHSGYQMSKRWPMKPFLLVTLVQL---LIFLKLQDQDKRDIYDGL                       | 1162 |
|                               | URV     | 1068 | TNMFRLIIEYFESLQGLGQCCILNKEEFNALILGM---KLVNSLAHSGYQMSKRWPMKPFLLVTLVQL---LIFLKLQDQDKRDIYDGL                       | 1157 |
|                               | GGV     | 1099 | TNMFRLIIEYFESLQGLGQCCILNKEEFNALILGM---KLVNSLAHSGYQMSKRWPMKPFLLVTLVQL---LIFLKLQDQDKRDIYDGL                       | 1188 |
|                               | ROUTV   | 1098 | TNMFRLIIEYFESLQGLGQCCILNKEEFNALILGM---KLVNSLAHSGYQMSKRWPMKPFLLVTLVQL---LIFLKLQDQDKRDIYDGL                       | 1187 |
| hantmaniruses                 | HISV-1  | 961  | TNMFRLIIEYFAELQGLGQCCILNKEEFNALILGM---KLVNSLAHSGYQMSKRWPMKPFLLVTLVQL---LIFLKLQDQDKRDIYDGL                       | 1065 |
|                               | HISV-2  | 947  | TNMFRLIIEYFAELQGLGQCCILNKEEFNALILGM---KLVNSLAHSGYQMSKRWPMKPFLLVTLVQL---LIFLKLQDQDKRDIYDGL                       | 1065 |
|                               | VP2V-1  | 1141 | TNMFRLIIEYFAELQGLGQCCILNKEEFNALILGM---KLVNSLAHSGYQMSKRWPMKPFLLVTLVQL---LIFLKLQDQDKRDIYDGL                       | 1071 |
|                               | Oscv-1  | 953  | TNMFRLIIEYFAELQGLGQCCILNKEEFNALILGM---KLVNSLAHSGYQMSKRWPMKPFLLVTLVQL---LIFLKLQDQDKRDIYDGL                       | 1069 |
| antennaviruses                | W1FAV-1 | 1047 | TNMFRLIIEYFAELQGLGQCCILNKEEFNALILGM---KLVNSLAHSGYQMSKRWPMKPFLLVTLVQL---LIFLKLQDQDKRDIYDGL                       | 1132 |
|                               | W1FAV-2 | 1042 | TNMFRLIIEYFAELQGLGQCCILNKEEFNALILGM---KLVNSLAHSGYQMSKRWPMKPFLLVTLVQL---LIFLKLQDQDKRDIYDGL                       | 1127 |
| old world<br>mammarenaviruses | LASV    | 1231 | LWVHRLVEYFVNVAAMKFSIKAQLGKREK---KQSTIEDFFYSNFO---VGVVPHISSILMNGQCCILNCTDFALISERFYNYAISK---CGGTIDAYTS            | 1330 |
|                               | LUJV    | 1252 | LWVHRLVEYFVNVAAMKFSIKAQLGKREK---KQSTIEDFFYSNFO---VGVVPHISSILMNGQCCILNCTDFALISERFYNYAISK---CGGTIDAYTS            | 1361 |
|                               | IPFV    | 1217 | LWVHRLVEYFVNVAAMKFSIKAQLGKREK---KQSTIEDFFYSNFO---VGVVPHISSILMNGQCCILNCTDFALISERFYNYAISK---CGGTIDAYTS            | 1316 |
|                               | WNV     | 1234 | LWVHRLVEYFVNVAAMKFSIKAQLGKREK---KQSTIEDFFYSNFO---VGVVPHISSILMNGQCCILNCTDFALISERFYNYAISK---CGGTIDAYTS            | 1333 |
|                               | JUV     | 1227 | LWVHRLVEYFVNVAAMKFSIKAQLGKREK---KQSTIEDFFYSNFO---VGVVPHISSILMNGQCCILNCTDFALISERFYNYAISK---CGGTIDAYTS            | 1317 |
|                               | MACV    | 1231 | LWVHRLVEYFVNVAAMKFSIKAQLGKREK---KQSTIEDFFYSNFO---VGVVPHISSILMNGQCCILNCTDFALISERFYNYAISK---CGGTIDAYTS            | 1331 |
| new world<br>mammarenaviruses | GOTV    | 1217 | LWVHRLVEYFVNVAAMKFSIKAQLGKREK---KQSTIEDFFYSNFO---VGVVPHISSILMNGQCCILNCTDFALISERFYNYAISK---CGGTIDAYTS            | 1317 |
|                               | OLVU    | 1240 | LWVHRLVEYFVNVAAMKFSIKAQLGKREK---KQSTIEDFFYSNFO---VGVVPHISSILMNGQCCILNCTDFALISERFYNYAISK---CGGTIDAYTS            | 1340 |
|                               | WRV     | 1225 | LWVHRLVEYFVNVAAMKFSIKAQLGKREK---KQSTIEDFFYSNFO---VGVVPHISSILMNGQCCILNCTDFALISERFYNYAISK---CGGTIDAYTS            | 1324 |
|                               | CALV    | 1203 | LWVHRLVEYFVNVAAMKFSIKAQLGKREK---KQSTIEDFFYSNFO---VGVVPHISSILMNGQCCILNCTDFALISERFYNYAISK---CGGTIDAYTS            | 1302 |
| reptarenaviruses              | FLEW    | 1218 | LWVHRLVEYFVNVAAMKFSIKAQLGKREK---KQSTIEDFFYSNFO---VGVVPHISSILMNGQCCILNCTDFALISERFYNYAISK---CGGTIDAYTS            | 1317 |
|                               | CASV    | 1163 | LWVHRLVEYFVNVAAMKFSIKAQLGKREK---KQSTIEDFFYSNFO---VGVVPHISSILMNGQCCILNCTDFALISERFYNYAISK---CGGTIDAYTS            | 1271 |
|                               | URV     | 1158 | LWVHRLVEYFVNVAAMKFSIKAQLGKREK---KQSTIEDFFYSNFO---VGVVPHISSILMNGQCCILNCTDFALISERFYNYAISK---CGGTIDAYTS            | 1260 |
|                               | GGV     | 1189 | LWVHRLVEYFVNVAAMKFSIKAQLGKREK---KQSTIEDFFYSNFO---VGVVPHISSILMNGQCCILNCTDFALISERFYNYAISK---CGGTIDAYTS            | 1291 |
| hantmaniruses                 | ROUTV   | 1188 | LWVHRLVEYFVNVAAMKFSIKAQLGKREK---KQSTIEDFFYSNFO---VGVVPHISSILMNGQCCILNCTDFALISERFYNYAISK---CGGTIDAYTS            | 1290 |
|                               | HISV-1  | 1066 | LWVHRLVEYFVNVAAMKFSIKAQLGKREK---KQSTIEDFFYSNFO---VGVVPHISSILMNGQCCILNCTDFALISERFYNYAISK---CGGTIDAYTS            | 1170 |
|                               | HISV-2  | 1066 | LWVHRLVEYFVNVAAMKFSIKAQLGKREK---KQSTIEDFFYSNFO---VGVVPHISSILMNGQCCILNCTDFALISERFYNYAISK---CGGTIDAYTS            | 1170 |
|                               | VP2V-1  | 1072 | LWVHRLVEYFVNVAAMKFSIKAQLGKREK---KQSTIEDFFYSNFO---VGVVPHISSILMNGQCCILNCTDFALISERFYNYAISK---CGGTIDAYTS            | 1176 |
| antennaviruses                | Oscv-1  | 1070 | LWVHRLVEYFVNVAAMKFSIKAQLGKREK---KQSTIEDFFYSNFO---VGVVPHISSILMNGQCCILNCTDFALISERFYNYAISK---CGGTIDAYTS            | 1174 |
|                               | W1FAV-1 | 1133 | LWVHRLVEYFVNVAAMKFSIKAQLGKREK---KQSTIEDFFYSNFO---VGVVPHISSILMNGQCCILNCTDFALISERFYNYAISK---CGGTIDAYTS            | 1232 |
|                               | W1FAV-2 | 1128 | LWVHRLVEYFVNVAAMKFSIKAQLGKREK---KQSTIEDFFYSNFO---VGVVPHISSILMNGQCCILNCTDFALISERFYNYAISK---CGGTIDAYTS            | 1227 |
|                               | LASV    | 1331 | DDQISLDFGLVSLQQ---RDPEEFRLIEFYSYIMDQINIVFPQSVIGRVAETRFVFWGDEVELLTVAAALENKCKEPRQLASTIDTDIDQVANGVPHLNLQKRLNL      | 1447 |
| old world<br>mammarenaviruses | LUJV    | 1352 | DDQISLDFGLVSLQQ---RDPEEFRLIEFYSYIMDQINIVFPQSVIGRVAETRFVFWGDEVELLTVAAALENKCKEPRQLASTIDTDIDQVANGVPHLNLQKRLNL      | 1468 |
|                               | IPFV    | 1317 | DDQISLDFGLVSLQQ---RDPEEFRLIEFYSYIMDQINIVFPQSVIGRVAETRFVFWGDEVELLTVAAALENKCKEPRQLASTIDTDIDQVANGVPHLNLQKRLNL      | 1433 |
|                               | WNV     | 1334 | DDQISLDFGLVSLQQ---RDPEEFRLIEFYSYIMDQINIVFPQSVIGRVAETRFVFWGDEVELLTVAAALENKCKEPRQLASTIDTDIDQVANGVPHLNLQKRLNL      | 1450 |
|                               | JUV     | 1318 | DDQISLDFGLVSLQQ---RDPEEFRLIEFYSYIMDQINIVFPQSVIGRVAETRFVFWGDEVELLTVAAALENKCKEPRQLASTIDTDIDQVANGVPHLNLQKRLNL      | 1444 |
|                               | MACV    | 1332 | DDQISLDFGLVSLQQ---RDPEEFRLIEFYSYIMDQINIVFPQSVIGRVAETRFVFWGDEVELLTVAAALENKCKEPRQLASTIDTDIDQVANGVPHLNLQKRLNL      | 1448 |
|                               | GOTV    | 1318 | DDQISLDFGLVSLQQ---RDPEEFRLIEFYSYIMDQINIVFPQSVIGRVAETRFVFWGDEVELLTVAAALENKCKEPRQLASTIDTDIDQVANGVPHLNLQKRLNL      | 1436 |
| new world<br>mammarenaviruses | OLVU    | 1341 | DDQISLDFGLVSLQQ---RDPEEFRLIEFYSYIMDQINIVFPQSVIGRVAETRFVFWGDEVELLTVAAALENKCKEPRQLASTIDTDIDQVANGVPHLNLQKRLNL      | 1460 |
|                               | WRV     | 1325 | DDQISLDFGLVSLQQ---RDPEEFRLIEFYSYIMDQINIVFPQSVIGRVAETRFVFWGDEVELLTVAAALENKCKEPRQLASTIDTDIDQVANGVPHLNLQKRLNL      | 1444 |
|                               | CALV    | 1303 | DDQISLDFGLVSLQQ---RDPEEFRLIEFYSYIMDQINIVFPQSVIGRVAETRFVFWGDEVELLTVAAALENKCKEPRQLASTIDTDIDQVANGVPHLNLQKRLNL      | 1422 |
|                               | FLEW    | 1318 | DDQISLDFGLVSLQQ---RDPEEFRLIEFYSYIMDQINIVFPQSVIGRVAETRFVFWGDEVELLTVAAALENKCKEPRQLASTIDTDIDQVANGVPHLNLQKRLNL      | 1436 |
| reptarenaviruses              | HISV    | 1171 | DDQASVLIQGE---N---AALTELEYLISKLNKISEYVSWGTVEVTFKIVSVGGQLEPPLTLILIPSGFVDFDVLNLTDTTQMGADYCAITQCQNLNLSMCKL         | 1278 |
|                               | HISV-1  | 1171 | DDQASVLIQGE---N---AALTELEYLISKLNKISEYVSWGTVEVTFKIVSVGGQLEPPLTLILIPSGFVDFDVLNLTDTTQMGADYCAITQCQNLNLSMCKL         | 1278 |
|                               | CASV    | 1272 | DDQASVLIQGE---N---AALTELEYLISKLNKISEYVSWGTVEVTFKIVSVGGQLEPPLTLILIPSGFVDFDVLNLTDTTQMGADYCAITQCQNLNLSMCKL         | 1389 |
|                               | URV     | 1261 | DDQASVLIQGE---N---AALTELEYLISKLNKISEYVSWGTVEVTFKIVSVGGQLEPPLTLILIPSGFVDFDVLNLTDTTQMGADYCAITQCQNLNLSMCKL         | 1377 |
| hantmaniruses                 | GGV     | 1292 | DDQASVLIQGE---N---AALTELEYLISKLNKISEYVSWGTVEVTFKIVSVGGQLEPPLTLILIPSGFVDFDVLNLTDTTQMGADYCAITQCQNLNLSMCKL         | 1408 |
|                               | ROUTV   | 1291 | DDQASVLIQGE---N---AALTELEYLISKLNKISEYVSWGTVEVTFKIVSVGGQLEPPLTLILIPSGFVDFDVLNLTDTTQMGADYCAITQCQNLNLSMCKL         | 1407 |
|                               | VP2V-1  | 1177 | DDQASVLIQGE---N---AALTELEYLISKLNKISEYVSWGTVEVTFKIVSVGGQLEPPLTLILIPSGFVDFDVLNLTDTTQMGADYCAITQCQNLNLSMCKL         | 1284 |
|                               | Oscv-1  | 1175 | DDQASVLIQGE---N---AALTELEYLISKLNKISEYVSWGTVEVTFKIVSVGGQLEPPLTLILIPSGFVDFDVLNLTDTTQMGADYCAITQCQNLNLSMCKL         | 1282 |
| antennaviruses                | W1FAV-1 | 1233 | DDQASVLIQGE---N---AALTELEYLISKLNKISEYVSWGTVEVTFKIVSVGGQLEPPLTLILIPSGFVDFDVLNLTDTTQMGADYCAITQCQNLNLSMCKL         | 1344 |
|                               | W1FAV-2 | 1228 | DDQASVLIQGE---N---AALTELEYLISKLNKISEYVSWGTVEVTFKIVSVGGQLEPPLTLILIPSGFVDFDVLNLTDTTQMGADYCAITQCQNLNLSMCKL         | 1339 |
| old world<br>mammarenaviruses | LASV    | 1448 | LQYARVDFPFLNCTDVRQWVGNRGRYIMRQEGELIPNA---CSKIRSM---1497                                                         |      |
|                               | LUJV    | 1459 | LQYARVDFPFLNCTDVRQWVGNRGRYIMRQEGELIPNA---CSKIRSM---1497                                                         |      |
|                               | IPFV    | 1434 | LQYARVDFPFLNCTDVRQWVGNRGRYIMRQEGELIPNA---CSKIRSM---1497                                                         |      |
|                               | CASV    | 1390 | LQYARVDFPFLNCTDVRQWVGNRGRYIMRQEGELIPNA---CSKIRSM---1497                                                         |      |
|                               | MACV    | 1449 | LQYARVDFPFLNCTDVRQWVGNRGRYIMRQEGELIPNA---CSKIRSM---1497                                                         |      |
|                               | GOTV    | 1437 | LQYARVDFPFLNCTDVRQWVGNRGRYIMRQEGELIPNA---CSKIRSM---1497                                                         |      |
| new world<br>mammarenaviruses | OLVU    | 1461 | LQYARVDFPFLNCTDVRQWVGNRGRYIMRQEGELIPNA---CSKIRSM---1497                                                         |      |
|                               | WRV     | 1445 | LQYARVDFPFLNCTDVRQWVGNRGRYIMRQEGELIPNA---CSKIRSM---1497                                                         |      |
|                               | CALV    | 1423 | LQYARVDFPFLNCTDVRQWVGNRGRYIMRQEGELIPNA---CSKIRSM---1497                                                         |      |
|                               | FLEW    | 1437 | LQYARVDFPFLNCTDVRQWVGNRGRYIMRQEGELIPNA---CSKIRSM---1497                                                         |      |
| reptarenaviruses              | URV     | 1429 | LQYARVDFPFLNCTDVRQWVGNRGRYIMRQEGELIPNA---CSKIRSM---1497                                                         |      |
|                               | GGV     | 1409 | LQYARVDFPFLNCTDVRQWVGNRGRYIMRQEGELIPNA---CSKIRSM---1497                                                         |      |
|                               | ROUTV   | 1408 | LQYARVDFPFLNCTDVRQWVGNRGRYIMRQEGELIPNA---CSKIRSM---1497                                                         |      |
|                               | WNV     | 1451 | LQYARVDFPFLNCTDVRQWVGNRGRYIMRQEGELIPNA---CSKIRSM---1497                                                         |      |
| hantmaniruses                 | HISV    | 1279 | LQYARVDFPFLNCTDVRQWVGNRGRYIMRQEGELIPNA---CSKIRSM---1497                                                         |      |
|                               | HISV-2  | 1279 | LQYARVDFPFLNCTDVRQWVGNRGRYIMRQEGELIPNA---CSKIRSM---1497                                                         |      |
|                               | VP2V-1  | 1285 | LQYARVDFPFLNCTDVRQWVGNRGRYIMRQEGELIPNA---CSKIRSM---1497                                                         |      |
|                               | Oscv-1  | 1283 | LQYARVDFPFLNCTDVRQWVGNRGRYIMRQEGELIPNA---CSKIRSM---1497                                                         |      |
| antennaviruses                | W1FAV-1 | 1345 | LQYARVDFPFLNCTDVRQWVGNRGRYIMRQEGELIPNA---CSKIRSM---1497                                                         |      |
|                               | W1FAV-2 | 1340 | LQYARVDFPFLNCTDVRQWVGNRGRYIMRQEGELIPNA---CSKIRSM---1497                                                         |      |

Figure S3. Amino acid sequence alignments of the L protein enzymatic domain from representative members of the four arenavirus genera. Virus abbreviations are as in Figure 5. Residues that are conserved (identical or chemically similar) are highlighted in yellow (not required for polymerase activity) or green (required for polymerase activity).

|                               |       |                                                             |                                                              |     |
|-------------------------------|-------|-------------------------------------------------------------|--------------------------------------------------------------|-----|
| old world<br>mammarenaviruses | LASV  | 1                                                           | MGNKQAKA-----PESKDSP-----RA--SLIPDATHLGPQF                   | 30  |
|                               | LUJV  | 1                                                           | MGQRHSSGSGQPMPK-PSDSDEAR-----RS--ELHSDASHLGPLN               | 39  |
|                               | IPPYV | 1                                                           | MGQNQSRDKQKAIQ---NQPKDTGN-----RA--DIIPDATGMGPEF              | 37  |
|                               | WENV  | 1                                                           | MGNKVPKENK-----PATPPPY-----RA--FVIPDTSHLGPTF                 | 32  |
| new world<br>mammarenaviruses | JUNV  | 1                                                           | MGNCNGASK---SNQ-PDSSRATQP-----AAEFRRVAHSSLYGRYN              | 38  |
|                               | MACV  | 1                                                           | MGNCNKPPK---RPP-NTQTSSNQF-----SAEFRRTAPPGLYGRYN              | 38  |
|                               | GOTV  | 1                                                           | MGNKSKSN---PSSSESQKGAPT-----VTEFRRTAIHSLYGRYN                | 39  |
|                               | OLVV  | 1                                                           | MGSKSSKSSGFENVPELGLSHTNQF-----RVSLIREARPSLYGRYN              | 42  |
|                               | WAV   | 1                                                           | MGLRYSKEVRDRYGD---KE-PEG-----RIPITLNMFPQTYGRYN               | 37  |
| reptarenaviruses              | CALV  | 1                                                           | MGLRYSKEVRKRHGD---ED-VVG-----RVPMTLNLPPQGLYGRFN              | 37  |
|                               | FLEV  | 1                                                           | MGLRYSKAVRDRYGE---RE-TVG-----RVPMTLNLPPQGLYGRFN              | 37  |
|                               | CASV  | 1                                                           | MSMCINGTNS--IG---ISNEVVLSTLISSLTLLILLIINTITMFGKALTLKKRLSF    | 54  |
|                               | UHV   | 1                                                           | ----MSTSTS--IG---LTTEIISIVTFILVIVLVVIQIVSCVTMLSLKGVTLKKRLRF  | 50  |
|                               | GGV   | 1                                                           | ----MSGSTA--IG---LTTEVISIITFILVIAIFVIEIVSCVTMTLKAITLKKRLSF   | 50  |
| ROUTV                         | 1     | ----MSESTA--IG---LTTEVISIITFILVVIIFIVVIVNCVAMMTLKAITLKKRLMF | 50                                                           |     |
| old world<br>mammarenaviruses | LASV  | 31                                                          | CKSCWFENKGLV-ECNNHYLCLNCLTLLLSVSNRCPICKMPLPTKL-----          | 75  |
|                               | LUJV  | 40                                                          | CKSCWKSKKALV-KOYDHYLCLNCLSLLLMGITPRCPFCYRELPKNL-----         | 84  |
|                               | IPPYV | 38                                                          | CKSCWFERRSLV-ACNNHYLCMNCLTLLLSVGERCPICKLPLPQKL-----          | 82  |
|                               | WENV  | 33                                                          | CKSCWFESKGLV-ACSNHYLCMNCLTLLLSASDRCPICKLPLPTKL-----          | 77  |
|                               | JUNV  | 39                                                          | CKCWFADTNLI-TONDHYLCLRCHQGMRLNSDLCNICWKPLPTTI-----           | 83  |
|                               | MACV  | 39                                                          | CKCWFADTNLI-TONDHYLCLRCHQTMRLNSELCNICWKPLPTSI-----           | 83  |
|                               | GOTV  | 40                                                          | CKCWFADKNLI-KOSDHYLCLRCLNVMLKNSDLCNICWEQLPTCI-----           | 84  |
| new world<br>mammarenaviruses | OLVV  | 43                                                          | CKCWFQKNLV-ECSDHYLCLKCISMLRRGQNCIEICGKPIPTHI-----            | 87  |
|                               | WAV   | 38                                                          | CKSCWFANKGLL-KCSNHYLCLKCLTLMGRSDYCGICGCVLPKKL-----           | 82  |
|                               | CALV  | 38                                                          | CKSCWFVNKGLI-RCKDHYLCLGCLTKMHSRGNLCEICGHSLPTKM-----          | 82  |
|                               | FLEV  | 38                                                          | CKSCWFANKGLI-ACSDHYLCLNCLTRMLSRSEFCEICNRPLPTKI-----          | 82  |
| reptarenaviruses              | CASV  | 55                                                          | CTACGKNSSLVKLPCKHK-CCIQCPLAN----LKCPICYEFLWCEKADGGSLESLSLMMK | 109 |
|                               | UHV   | 51                                                          | CQGGKNASLVVLPCKNS-VCMECALK----MRCPVCFEFLWCEENPDGSLTSLALVNR   | 104 |
|                               | GGV   | 51                                                          | CQGGKNASLVILPCKNK-VCMECALK----MRCPVCEACLWCEENPDGSLSSALVNR    | 104 |
| ROUTV                         | 51    | CQGGKNASLVILPCKNK-VCMECALK----MRCPVCEACLWCEENPDGSLSSALVNR   | 104                                                          |     |
| old world<br>mammarenaviruses | LASV  | 76                                                          | RPSAAPTAPPTGAADSIRPPPYSP                                     | 99  |
|                               | LUJV  | 85                                                          | DLAEAPSAPPL-----                                             | 95  |
|                               | IPPYV | 83                                                          | KLTGSPSAPPSPS----PPPYSP                                      | 101 |
|                               | WENV  | 78                                                          | RLSRTPSAPPSPDTP-----                                         | 91  |
|                               | JUNV  | 84                                                          | TVPVEPTAPP-----                                              | 94  |
|                               | MACV  | 84                                                          | TVPVEPSAPP-----                                              | 94  |
|                               | GOTV  | 85                                                          | TVPEEPSAPPE-----                                             | 95  |
| new world<br>mammarenaviruses | OLVV  | 88                                                          | AVTTAPTAPPE-----                                             | 99  |
|                               | WAV   | 83                                                          | VFENSPGAPPYEA-----                                           | 95  |
|                               | CALV  | 83                                                          | EFLESPGAPPYEP-----                                           | 95  |
|                               | FLEV  | 83                                                          | IFEESPGAPPYEP-----                                           | 95  |
| reptarenaviruses              | CASV  | 110                                                         | NLQELP-----                                                  | 115 |
|                               | UHV   | 105                                                         | EMGASGTTTRV-----                                             | 115 |
|                               | GGV   | 105                                                         | ERNKVRDNLPEP-----                                            | 116 |
|                               | ROUTV | 105                                                         | ERNKHRDNPPEP-----                                            | 116 |

Figure S4. Amino acid sequence alignments of Zinc-binding (matrix) proteins from representative members of the mammarenavirus and hartmanivirus genera. Residues that comprise zinc-binding domain 1 are highlighted in yellow. Residues that comprise zinc-binding domain 2 are highlighted in orange or blue. A transmembrane domain in the Z protein of reptarenavirus is highlighted in grey. Reptarenaviruses and antennaviruses do not encode a Z protein.
